# Supplementary material for: PriTKT: A Blockchain-Enhanced Privacy-Preserving Electronic Ticket System for IoT Devices
Source: MDPI journal article supplement (doi:10.3390/s24020496), 2024-01-13
Supplement: s1 [file s1]

## Supplemental Material

### S1. Correctness Analysis

We claim that PriTKT system described in section 4 is correct. Using the properties of bilinear maps, it is trivial to validate that the equations in **Setup**, **SKeyGen** and **UKeyGen** which are used to system initialization and key generation, and Pse. 6 and Pse. 7 which are used to verify the credentials sent to U and S, hold. Similarly, it is straightforward to verify the equations in **DSTrace** and **VerifyDS**, which are used to detect double-spending and verify the correctness of double-spending tracing.

We prove that the correctness of the equations in Pse. 8 and Pse. 9 also hold true. The former are used by U and S to issue tickets, while the latter are used by U and V to show tickets.

The following prove that the **Issue** algorithm is correct. For a valid credential  $cred_u = (\tilde{\sigma}_1, \tilde{\sigma}_2)$  issued on  $\mathbb{A}$  and  $usk$ , we have:

$$e(X(Y_0)^{usk} \prod_{i \in [N]} Y_i^{a_i}, \tilde{\sigma}_1) = e(g, \tilde{\sigma}_2) \quad (1)$$

which is equivalent to:

$$e((Y_0)^{usk}, \tilde{\sigma}_1) = e(g, \tilde{\sigma}_2) e(X \prod_{i \in [N]} Y_i^{a_i}, \tilde{\sigma}_1)^{-1} \quad (2)$$

Therefore:

$$\begin{aligned} & e(Y_0^s, \tilde{\sigma}_1') (\sigma_3')^{-1} \\ &= e(Y_0, \tilde{\sigma}_1'^s) e(Y_0, \tilde{\sigma}_1'^{r \cdot k}) \\ &= e(Y_0, \tilde{\sigma}_1'^{(s-k)}) = e((Y_0)^{usk}, \tilde{\sigma}_1')^{r \cdot c} \\ &= [e(g, \tilde{\sigma}_2) e(X \prod_{i \in [N]} Y_i^{a_i}, \tilde{\sigma}_1)^{-1}]^{r \cdot c} \\ &= [e(g, \tilde{\sigma}_2') e(g, \tilde{\sigma}_1')^{-t} e(X \prod_{i \in [N]} Y_i^{a_i}, \tilde{\sigma}_1')^{-1}]^c \\ &= [e(g, \tilde{\sigma}_2') e(X g^t \prod_{i \in [N]} Y_i^{a_i}, \tilde{\sigma}_1')^{-1}]^c \\ &= [e(g, \tilde{\sigma}_2') e(X \sigma_1 \prod_{i \in \mathcal{D}} Y_i^{a_i}, \tilde{\sigma}_1')^{-1}]^c \end{aligned} \quad (3)$$

and

$$\begin{aligned} & e(\sigma_1, \prod_{i \in \mathcal{D} \cup \{0\}} \tilde{Y}_i) \\ &= e(\prod_{i \in [N] \setminus \mathcal{D}} Y_i^{a_i}, \prod_{i \in \mathcal{D} \cup \{0\}} \tilde{Y}_i) e(g^t, \prod_{i \in \mathcal{D} \cup \{0\}} \tilde{Y}_i) \\ &= e((\prod_{i \in [N] \setminus \mathcal{D}} Y_i^{a_i}, \tilde{g})^{\sum_{i \in \mathcal{D} \cup \{0\}} y_i}) e((\prod_{i \in \mathcal{D} \cup \{0\}} Y_i)^t, \tilde{g}) \\ &= e(\sigma_2, \tilde{g}) \end{aligned} \quad (4)$$

in addition, we have

$$\begin{aligned} & [(\sigma_3')^{-1} \cdot e(Y_0^s, \tilde{\sigma}_1')]^{c^{-1}} \\ &= [e(Y_0^k, \tilde{\sigma}_1')^{-1} e((Y_0^s, \tilde{\sigma}_1')]^{c^{-1}} \\ &= e(Y_0^{s-k}, \tilde{\sigma}_1')^{c^{-1}} \\ &= e(Y_0^{c-usk}, \tilde{\sigma}_1')^{c^{-1}} \\ &= e(Y_0^{usk}, \tilde{\sigma}_1') = \omega \end{aligned} \quad (5)$$

Eqs. 1, Eqs. 2, Eqs. 3, Eqs. 4 and Eqs. 5 are used to show the correctness of **Issue** algorithm.

The following prove that the **Show** algorithm is correct. For a valid ticket  $tkt = (\tilde{T}_1, \tilde{T}_2)$ , we have:

$$e(AB_0^{usk} B_1^{dsid} B_2^{dsrnd} B_3^{VP_{tkt}}, \tilde{T}_1) = e(g, \tilde{T}_2) \quad (6)$$

which is equivalent to:

$$e(B_0^{usk}, \tilde{T}_1) = e(g, \tilde{T}_2) e(AB_1^{dsid} B_2^{dsrnd} B_3^{VP_{tkt}}, \tilde{T}_1)^{-1} \quad (7)$$

Therefore:

$$\begin{aligned} & e(B_0^s, \tilde{T}_1') (T_3')^{-1} \\ &= e(B_0, \tilde{T}_1'^s) e(B_0, \tilde{T}_1'^{-r' \cdot dsrnd}) \\ &= e(B_0, \tilde{T}_1'^{(s' - dsrnd)}) = e(B_0^{usk}, \tilde{T}_1')^{r' \cdot c'} \\ &= [e(g, \tilde{T}_2) e(AB_1^{dsid} B_2^{dsrnd} B_3^{VP_{tkt}}, \tilde{T}_1)^{-1}]^{r' \cdot c'} \\ &= [e(g, \tilde{T}_2') e(g, \tilde{T}_1')^{-t'} e(AB_1^{dsid} B_2^{dsrnd} B_3^{VP_{tkt}}, \tilde{T}_1')^{-1}]^{c'} \\ &= [[e(g, \tilde{T}_2') e(AG^t B_1^{dsid} B_2^{dsrnd} B_3^{VP_{tkt}}, \tilde{T}_1')^{-1}]^{c'} \\ &= [e(g, \tilde{T}_2') e(AT_1 B_1^{dsid} B_3^{VP_{tkt}}, (\tilde{T}_1')^{-1})]^{c'} \end{aligned} \quad (8)$$

and

$$\begin{aligned} & e(T_1, \tilde{B}_0 \tilde{B}_1 \tilde{B}_3) \\ &= e(B_2^{dsrnd}, \tilde{B}_0 \tilde{B}_1 \tilde{B}_3) e(g^{t'}, \tilde{B}_0 \tilde{B}_1 \tilde{B}_3) \\ &= e((B_2^{dsrnd})^{b_0 + b_1 + b_3}, \tilde{g}) e((B_0 B_1 B_3)^{t'}, \tilde{g}) \\ &= e(T_2, \tilde{g}) \end{aligned} \quad (9)$$

The equations 6, 7, 8 and 9 are utilized to prove the correctness of the **Show** algorithm.

### S2. Security Proof

Let  $\Pi_1, \Pi_2, \Pi_3, \Pi_4$  be ZKSoKs, and the formal proofs of the PriTKT system are provided as follows.

#### S2.1 Unforgeability of Credentials.

**Theorem 1:** In PriTKT system, the user's credential is unforgeable if the DL assumption holds in  $\mathbb{G}_2$  and if URS is unforgeable.

**Proof:** Suppose an adversary  $\mathcal{A}$  aims to breach the credential unforgeability of PriTKT.  $\mathcal{A}$  wins the  $Exp^{\mu_{fcred}}$  game when it succeeds in forging a user's attribute credential. Let  $usk$  denote the user's private key, and if  $\mathcal{A}$  presents the credential, it

proves the knowledge of  $usk$ . The adversary's objective is to forge the credential of either a registered or unregistered user in the  $\text{Issue}$  algorithm. Accordingly, we identify two types of adversaries:

**Type-1:**  $\mathcal{A}$  forges  $\text{cred}_i$ , where  $\exists i \in \mathcal{HU}$ , and  $\mathcal{USK}[i] = usk$ ;

**Type-2:**  $\mathcal{A}$  forges  $\text{cred}_i$ , where  $\forall i \in \mathcal{HU}$ , and  $\mathcal{USK}[i] \neq usk$ ;

**Lemma 1.** If there is a type-1 adversary  $\mathcal{A}$  that breaks the unforgeability of credentials with the probability  $\epsilon$ , then there is a challenger  $C$  that breaks the DL assumption with the probability  $\frac{\epsilon}{n}$ , where  $n$  is a bound on the number of honest users.

**Proof:** Let  $(\tilde{g}, \tilde{g}^x)$  be a DL challenge in  $\mathbb{G}_2$ .  $C$  use  $\tilde{g}$  as the generator for  $\mathbb{G}_2$ .  $C$  runs  $(msk, pp, \mathbb{P}) \leftarrow \text{Setup}(1^\lambda)$ , and then runs  $\tau \leftarrow \text{SimGen}(1^\lambda)$  to generate a trapdoor of ZKSoK using  $pp$  as paramters.  $C$  sends  $(pp, \mathbb{P})$  to  $\mathcal{A}$ . When we consider a type-1 forgery, there is an user identity  $i^*$  such that  $\mathcal{A}$  will try to impersonate the  $i^*$ -th honest user in the  $\text{Issue}$  algorithm.  $C$  makes a guess on  $i^* \in [n]$  and answers oracles queries as follows:

- $O_{HU}(i)$ . If  $i \neq i^*$ , then  $C$  proceeds as usual. Otherwise, it assigns  $\mathcal{UPK}[i] = \tilde{g}^x$  and adds  $i$  to  $\mathcal{HU}$ ; it returns  $\mathcal{UPK}[i]$ .

- $O_{CU}(i, upk)$ . If  $i \neq i^*$ , then  $C$  proceeds as usual and aborts otherwise.

- $O_{UReg}(i, \mathbb{A})$ .  $C$  knows CA's secret  $msk$  and so perfectly plays CA's part of this oracle. It can also simulate the honest user  $i$ , if  $i \neq i^*$ . Otherwise, it simulates the ZKSoK of  $x$ .

- $O_{HS}(j), O_{SReg}(j), O_{Iss}(j, i, \mathcal{D})$ .  $C$  knows CA and seller's secret and so perfectly simulates these oracles.

- $O_{Iss}(i, j, \mathcal{D})$ .  $C$  knows the seller's secret  $ssk$  and so perfectly plays the seller's part of this oracle. It can also simulate the honest user  $i$ , if  $i \neq i^*$ . Otherwise, it simulates the ZKSoK of  $x$ . Note that  $x$  only appears in the following contexts: (1)  $s = k + c \cdot x$ ; (2)  $\omega = e(Y_0^x, \tilde{\sigma}_1^*)$ ; (3)  $\Pi_3$ .  $C$  computes  $\omega = e(Y_0, (\tilde{g}^x)^{r_{u^*}})$ . Since (1) and (3) use the signature of knowledge, they are easy to simulate.

- $O_{Shw}(i, j)$ . If  $i \neq i^*$ , then  $C$  can perfectly play the user's part of this oracle. Otherwise, it runs the algorithm but simulates the ZKSoK of  $x$ . Note that  $x$  only appears in  $s' = dsrnd + c' \cdot x$ , it is easy to simulate.

If the guess on  $i^*$  is correct, the game is simulated perfectly and the probability of occurrence is  $\frac{1}{n}$ . In this case, a successful adversary  $\mathcal{A}$  proves the ZKSoK of  $x$  when it obtains a ticket in  $\text{Issue}$  algorithm.  $C$  can then run the extractor of  $\Pi_3$  to restore  $x$ , which is returned as a valid solution to the DL assumption. The probability of success for  $C$  is  $\frac{\epsilon}{n}$ .

**Lemma 2.** If there is a type-2 adversary  $\mathcal{A}$  that breaks the unforgeability of credentials with the probability  $\epsilon$ , then there is a challenger  $C$  that breaks the unforgeability of the URS scheme with the same probability.

**Proof:**  $C$  runs the unforgeability game of the URS and so receives a public parameters  $(\mathbb{G}_1, \mathbb{G}_2, \mathbb{G}_T, g, \tilde{g}, p, e, X, Y_0, \dots, Y_N, \tilde{Y}_0, \dots, \tilde{Y}_N, Z_{i,j}, 0 \leq i \neq j \leq N)$ .  $C$  runs  $\text{Setup}(1^\lambda)$  to generate remaining parameters  $(h, \tilde{D}, \tilde{E}_0, \dots, \tilde{E}_3, \mathbb{P})$ , and then runs  $\tau \leftarrow \text{SimGen}(1^\lambda)$  to generate a trapdoor of ZKSoK using  $pp$  as paramters.  $C$  sends  $(pp, \mathbb{P})$  to adversary  $\mathcal{A}$ .  $C$  can ask the

oracle of URS,  $O_{Sign}(\cdot)$ , with an unlimited number of times.  $C$  answers oracles queries as follows:

- $O_{HU}(i), O_{HS}(j), O_{CU}(i, upk), O_{Iss}(i, j, \mathcal{D}), O_{Shw}(i, j), O_{Iss}(j, i, \mathcal{D})$ .  $C$  knows users and sellers secret keys and so perfectly simulates these oracles.

- $O_{SReg}(j)$ .  $C$  knows CA's secret which used to sign the seller's credential and so perfectly simulates this oracle.

- $O_{UReg}(i, \mathbb{A})$ .  $C$  runs the extractor of  $\Pi_2$  to recovers the secret key  $\mathcal{USK}[i]$  and then submits  $(\mathcal{USK}[i], \mathbb{A})$  to the URS signing oracle  $O_{Sign}(\cdot)$ . It then receives a URS signature  $(\sigma_1, \sigma_2, \tilde{\sigma}_1, \tilde{\sigma}_2)$  whose first two elements are  $1_{\mathbb{G}_1}$ .  $C$  then discards  $(\sigma_1, \sigma_2)$  and stores the resulting credential  $(\tilde{\sigma}_1, \tilde{\sigma}_2)$ .

$C$  can handle any oracles queries and never aborts. Therefore, at the end of the game, if  $\mathcal{A}$  can prove possession of a credential on disclosed attributes set  $\mathbb{D}$  with probability  $\epsilon$ , then  $C$  extracts  $usk^*$  from  $\Pi_3$  and stores the elements  $(\sigma_1^*, \sigma_2^*, \tilde{\sigma}_1^*, \tilde{\sigma}_2^*)$ . Since we consider a type-2 forgery, for any honest user  $i$ ,  $usk^*$  must be different from  $\mathcal{USK}[i]$ , so  $C$  constructs a valid derived signature on  $(usk^*, \mathbb{D}, \cdot)$ .

## S2.2 Unforgeability of Tickets.

**Theorem 2:** In PriTKT system, the user's tickets are unforgeable if the DL assumption holds in  $\mathbb{G}_2$  and if URS is unforgeable.

**Proof:** Let  $\mathcal{A}$  be an adversary against the unforgeability of tickets in PriTKT system. When  $\mathcal{A}$  wins the game  $\text{Exp}_{\text{PriTKT}}^{\text{uf}}(\mathcal{A})$ ,  $\mathcal{A}$  forges a ticket. Let  $usk$  be the user private key, and when  $\mathcal{A}$  shows the ticket, the knowledge of  $usk$  is proved by  $\mathcal{A}$ . The adversary wins if they can forge a ticket of an honest user or a ticket of an unregistered user in  $\text{Show}$  algorithm, therefore we distinguish two types of adversary:

**Type-3:**  $\mathcal{A}$  forges  $\text{tk}_i$ , where  $\exists i \in \mathcal{HU}$ , and  $\mathcal{USK}[i] = usk$ ;

**Type-4:**  $\mathcal{A}$  forges  $\text{tk}_i$ , where  $\forall i \in \mathcal{HU}$ , and  $\mathcal{USK}[i] \neq usk$ ;

**Lemma 3.** If there is a type-3 adversary  $\mathcal{A}$  that breaks the unforgeability of tickets with the probability  $\epsilon$ , then there is a challenger  $C$  that breaks the DL assumption with the probability  $\frac{\epsilon}{n}$ , where  $n$  is a bound on the number of honest users.

**Proof:** Assumptions and oracles definitions are consistent with **lemma 1**. In this case, a successful adversary  $\mathcal{A}$  proves knowledge of  $x$  when it shows the ticket in  $\text{Show}$  algorithm.  $C$  can then run the extractor of ZKSoK to restore  $x$ , which is returned as a valid solution to the DL assumption. The probability of success for  $C$  is  $\frac{\epsilon}{n}$ .

**Lemma 4.** If there is a type-4 adversary  $\mathcal{A}$  that breaks the unforgeability of tickets with the probability  $\epsilon$ , then there is a challenger  $C$  that breaks the unforgeability of the URS scheme with the probability  $\frac{\epsilon}{m}$ , where  $m$  is a bound on the number of honest sellers.

**Proof:**  $C$  runs the unforgeability game of the URS scheme and so receives a public key  $spk^* = (A^*, B_0^*, \dots, B_3^*, \tilde{B}_0^*, \dots, \tilde{B}_3^*, C_{0,2}^*, C_{1,2}^*, C_{3,2}^*)$  and bilinear paring paramaters  $pp = (\mathbb{G}_1, \mathbb{G}_2, \mathbb{G}_T, g, \tilde{g}, p, e)$ .  $C$  runs  $\text{Setup}(1^\lambda)$  to generate remaining parameters using  $pp$  as paramters, and then runs  $\tau \leftarrow \text{SimGen}(1^\lambda)$  to generate a trapdoor of ZKSoK.  $C$  sends  $(pp, \mathbb{P})$  to  $\mathcal{A}$ .  $C$  can ask

the oracle of URS,  $O_{\text{Sign}}(\cdot)$ , with an unlimited number of times. Since we consider a type-4 forgery, there is an identity  $j^*$  such that  $\mathcal{A}$  will try to forge a ticket that can be verified by the  $j^*$ -th honest seller's public key.  $C$  then makes a guess on  $j^* \in [m]$ .  $C$  can then answers oracle queries as follows.

- $O_{HU}(i), O_{CU}(i, upk), O_{UReg}(i, \mathbb{A}), O_{Shw}(i, j)$ .  $C$  knows CA and user's secret key and so perfectly simulates these oracles.
- $O_{HS}(j)$ . If  $j \neq j^*$ , then  $C$  proceeds as usual. Otherwise, it assign  $SPK[j] = spk^*$  and adds  $j$  to  $\mathcal{HS}$ ; it returns  $SPK[j]$ .
- $O_{SReg}(j)$ . If  $j \neq j^*$ , then  $C$  proceeds as usual. Otherwise, it simulates the signature of knowledge of  $SSK[j]$ .
- $O_{Iss}(j, i, \mathcal{D})$ . If  $j \neq j^*$ , then  $C$  proceeds as usual. Otherwise,  $C$  simulates the signature of knowledge of  $SSK[j]$ , and then runs the extractor of  $\Pi_3$  to recovers the secret  $(\mathcal{USK}[i], dsid', dsrnd)$  and then submits  $(\mathcal{USK}[i], dsid' + dsid'', dsrnd, VP_{ikt})$  to the signing oracle  $O_{\text{Sign}}(\cdot)$ . It then receives a URS signature  $(T_1^*, T_2^*, \tilde{T}_1^*, \tilde{T}_2^*)$  whose first two elements are  $1_{\mathbb{G}_1}$ .  $C$  then discards  $(T_1^*, T_2^*)$  and stores the resulting ticket  $(\tilde{T}_1^*, \tilde{T}_2^*)$ .
- $O_{Iss}(i, j, \mathcal{D})$ .  $C$  knows the user's secret key and so perfectly simulates the user's side of this oracle. If  $j \neq j^*$ , then  $C$  proceeds as usual. Otherwise, it performs the same operation as  $O_{Iss}(j, i, \mathcal{D})$ .

At the end of the game,  $\mathcal{A}$  can prove possession of a ticket issued by seller  $j$  with probability  $\epsilon$ . If  $j \neq j^*$ , then it aborts and the probability of termination is  $\frac{m-1}{m}$ . Otherwise,  $C$  extracts  $usk^*$  from the ZKSoK and stores the elements  $(T_1^*, T_2^*, \tilde{T}_1^*, \tilde{T}_2^*)$ . Since we consider a type-4 forgery, for any honest user  $i$ ,  $usk^*$  must be different from  $\mathcal{USK}[i]$ , so  $C$  constructs a valid derived signature on  $(usk^*, dsid, dsrnd, VP_{ikt})$  with probability  $\frac{\epsilon}{m}$ .

### S2.3 Unlinkability of Credentials.

**Theorem 3:** In PriTKT system, the user's credential is unlinkable if the DDH assumption holds in  $\mathbb{G}_2$ .

**Proof:** If there is an adversary  $\mathcal{A}$  that breaks the unlinkability of credentials with the probability  $\epsilon$  in Issue algorithm, then there is a challenger  $C$  that breaks the DDH assumption in  $\mathbb{G}_2$  with the probability  $\frac{\epsilon}{n}$ , where  $n$  is a bound on the number of honest users.

Let  $(\tilde{g}, \tilde{g}^x, \tilde{g}^y, \tilde{g}^z)$  be a DDH challenge in  $\mathbb{G}_2$ ,  $C$  runs Setup  $(1^\lambda) \rightarrow (msk, pp, \mathbb{P})$  by using  $\tilde{g}$  as the generator for  $\mathbb{G}_2$ , and then runs  $\tau \leftarrow \text{SimGen}(1^\lambda)$  to generate a trapdoor of ZKSoK using  $pp$  as paramters.  $C$  sends  $(pp, \mathbb{P})$  to  $\mathcal{A}$ .  $C$  guesses the identity of the user  $i_b$ , the user will have the credential  $cred_{i_b}$  targeted by  $\mathcal{A}$ .  $C$  answers the first stage of the oracles query as follows.

- $O_{HS}(j), O_{CS}(j), O_{SReg}(j)$ .  $C$  knows CA and seller's secret keys and so perfectly simulates these oracles.
- $O_{HU}(i)$ . If  $i \neq i^*$ , then  $C$  proceeds as usual. Otherwise, it assigns  $\mathcal{UPK}[i] = \tilde{g}^x$ , and adds  $i$  to  $\mathcal{HU}$ ; it returns  $\mathcal{UPK}[i]$ .
- $O_{UReg}(i, \mathbb{A})$ .  $C$  knows CA's secret  $msk$  and so perfectly simulates CA's side of this oracle. It can also simulate the honest user  $i$ , if  $i \neq i^*$ . Otherwise, it simulates the ZKSoK of  $x$ .
- $O_{Iss}(i, j, \mathcal{D})$ .  $C$  can simulate the honest user  $i$ , if  $i \neq i^*$ . Otherwise, it simulates the ZKSoK of  $x$ . Note that  $x$  only appears in the following contexts: (1)  $s = k + c \cdot x$ ; (2)  $\omega = e(Y_0^x, \tilde{\sigma}_1^x)$ ; (3)  $\Pi_3$ .  $C$  compute  $\omega = e(Y_0, (\tilde{g}^x)^{u \cdot r})$ . Since (1) and

(3) use the ZKSoK, it is easy to simulate given that he has already computed  $\omega$ .

•  $O_{Iss}(i, j, \mathcal{D})$ .  $C$  knows  $S$ 's secret  $ssk$  and so perfectly plays the  $S$ 's side of this oracle. If  $i \neq i^*$ , then  $C$  proceeds as usual. Otherwise,  $C$  performs the same operation as  $O_{Iss}(i, j, \mathcal{D})$ .

•  $O_{Shw}(i, j)$ .  $C$  can simulate any honest user  $i$ , if  $i \neq i^*$ . Otherwise, it simulates the ZKSoK of  $x$ .

At some point in the game,  $\mathcal{A}$  outputs the indices  $i_0$  and  $i_1$  of two credentials along with a set of attributes  $\mathbb{D}^*$  and an honest seller  $j^*$ . If  $i_b \neq i^*$ , then  $C$  aborts. Otherwise, it proceeds as follows.

- $O_{Iss}(i_b, j^*, \mathcal{D}^*)$ .  $C$  first selects a random  $\alpha$  and computes:

$$\begin{aligned} \sigma_1^* &= g^\alpha \\ \sigma_2^* &= (\sigma_1^*)^{\sum_{i \in \mathcal{D}^* \cup \{0\}} y_i} \\ \tilde{\sigma}_1^* &= \tilde{g}^y \\ \tilde{\sigma}_2^* &= (\tilde{g}^z)^{y_0} (\tilde{\sigma}_1^*)^{x + \sum_{i \in \mathbb{A}} y_i \cdot a_i} \end{aligned}$$

The simulation of the ZKSoK of  $x$  is consistent with that of  $O_{Iss}(i_b, j^*, \mathcal{D}^*)$ .

- $O_{Shw}(i^*, j^*)$ .  $C$  simulates the ZKSoK of  $x$ .

If  $x \cdot y = z$ , then, by setting  $t = \alpha - \sum_{i \in [N] \setminus \mathcal{D}^*} y_i \cdot a_i$ , we can see that  $(\sigma_1^*, \sigma_2^*, \tilde{\sigma}_1^*, \tilde{\sigma}_2^*)$  are distributed as in the Issue algorithm. Otherwise,  $z$  is random, which means that  $\tilde{\sigma}_2^*$  is random. Since  $(\sigma_1^*, \sigma_2^*, \tilde{\sigma}_1^*, \tilde{\sigma}_2^*)$  are independent of  $x$  and  $\mathbb{D}^*$ ,  $\mathcal{A}$  cannot succeed in this game with non negligible advantage  $\epsilon$ . Therefore, the behaviour of  $\mathcal{A}$  can be used to solve the DDH assumption in  $\mathbb{G}_2$ , unless  $C$  aborts. The advantage of  $C$  is at least  $\frac{\epsilon}{n}$ .

### S2.4 Unlinkability of Tickets.

**Theorem 4:** In PriTKT system, the user's tickets are unlinkable if the DDH assumption holds in  $\mathbb{G}_2$ .

**Proof:** If there is an adversary  $\mathcal{A}$  that breaks the unlinkability with the probability  $\epsilon$  in Show algorithm, then there is a challenger  $C$  that breaks the DDH assumption in  $\mathbb{G}_1$  with the probability  $\frac{\epsilon}{n}$ , where  $n$  is a bound on the number of honest users.

The game setup for **Theorem 4** is the same as for **Theorem 3** except for the following oracles.

- $O_{Iss}(i^*, j^*, \mathcal{D}^*)$ . The simulation is the same as for  $O_{Iss}(i, j, \mathcal{D})$  in **Theorem 3**.
- $O_{Shw}(i^*, j^*)$ .  $C$  selects a random  $\alpha$  and computes:

$$\begin{aligned} T_1^* &= g^\alpha \\ T_2^* &= (T_1^*)^{b_0 + b_1 + b_3} \\ \tilde{T}_1^* &= \tilde{g}^y \\ \tilde{T}_2^* &= (\tilde{g}^z)^{b_0} (\tilde{T}_1^*)^{a + b_1 \cdot dsid + b_2 \cdot dsrnd + b_3 \cdot VP_{ikt}} \end{aligned}$$

and then  $C$  simulate the signature of knowledge of  $x$ .

If  $x \cdot y = z$ , then, by setting  $t = \alpha - (b_2 \cdot dsrnd)$ , we see that  $(T_1^*, T_2^*, \tilde{T}_1^*, \tilde{T}_2^*)$  are distributed as in the Show algorithm. Otherwise,  $z$  is random, which means that  $\tilde{T}_2^*$  is random. Since  $(T_1^*, T_2^*, \tilde{T}_1^*, \tilde{T}_2^*)$  are independent of  $x$ ,  $\mathcal{A}$  cannot succeed in this game with non negligible advantage  $\epsilon$ . Therefore, the behaviour of  $\mathcal{A}$  can be used to solve the DDH assumption in  $\mathbb{G}_2$ , unless  $C$  aborts. The advantage of  $C$  is then at least  $\frac{\epsilon}{n}$ .

### S2.5 Framing-resistance.

**Theorem 5:** PriTKT system is framing-resistance if the DL assumption holds in  $\mathbb{G}_2$ .

**Proof:** If there is an adversary  $\mathcal{A}$  that breaks the framing-resistance with the probability  $\epsilon$ , then there is a challenger  $C$  that breaks the DL assumption in  $\mathbb{G}_2$  with the probability  $\frac{\epsilon}{n}$ , where  $n$  is a bound on the number of honest users.

The setup and simulations of oracles are the same as that of **Lemma 1**.  $C$  perfectly simulates  $\text{Exp}^{fr}(\mathcal{A}, \lambda)$ . At some point,  $\mathcal{A}$  outputs  $(dsblame, upk')$  with non negligible advantage  $\epsilon$ . If  $upk' \neq \mathcal{UPK}[i^*]$ , then  $C$  aborts. Otherwise,  $C$  outputs  $x = dsblame$ .  $C$  outputs the correct discrete logarithm  $x$ , if  $upk' = \mathcal{UPK}[i^*] = \tilde{g}^x$ . The advantage of  $C$  is then at least  $\frac{\epsilon}{n}$ .

### S3. Zero-Knowledge Signature of Knowledge

The zero-knowledge signature of knowledge mentioned in section 5.2 can be instantiated by Fiat-Shamir paradigm [51].

#### S3.1 Details of $\Pi_1$ and $\Pi'_1$ .

The proof  $\Pi_1 = \Pi'_1 = \text{ZKSoK}\{(a, b_0, b_1, \dots, b_3) : A = g^a \wedge B_i = g^{b_i}, 0 \leq i \leq 3\}$  is computed as below.

(1)  $S$  select  $(\beta_0, \dots, \beta_4) \xleftarrow{R} \mathbb{Z}_p^5$  and computes  $P_0 = g^{\beta_0}, \dots, P_4 = g^{\beta_4}$ ,  $c_1 = H(A \| B_0 \| \dots \| B_3 \| P_0 \| \dots \| P_4)$  and  $t_0 = \beta_0 - a \cdot c_1$ ,  $t_1 = \beta_1 - b_0 \cdot c_1, \dots, t_4 = \beta_4 - b_3 \cdot c_2$ .  $S$  send  $\Pi_1 = (c_1, t_0, \dots, t_4)$  to  $CA$ .

(2)  $CA$  verifies  $c_1 \stackrel{?}{=} H(A \| B_0 \| \dots \| B_3 \| g^{t_0} A^{c_1} \| g^{t_1} B_0^{c_1} \| \dots \| g^{t_4} B_4^{c_1})$ .

#### S3.2 Details of $\Pi_2$ .

The proof  $\Pi_2 = \text{ZKSoK}\{usk : upk = \tilde{g}^{usk}\}$  is computed as below.

(1)  $U$  select  $\alpha_1 \xleftarrow{R} \mathbb{Z}_p$  and compute  $R_1 = \tilde{g}^{\alpha_1}$ ,  $c_2 = H(upk \| R_1)$ ,  $s_1 = \alpha_1 - usk \cdot c_2$ .  $U$  sends  $\Pi_2 = (c_1, s_1)$  to  $CA$ .

(2)  $CA$  verifies  $c_2 \stackrel{?}{=} H(upk \| \tilde{g}^{s_1} upk^{c_2})$ .

#### S3.3 Details of $\Pi_3$ .

The proof  $\Pi_3 = \text{ZKSoK}\{(usk, dsid', dsrnd) : \omega = e(Y_0^{usk}, \tilde{\sigma}'_1) \wedge psu = \tilde{B}_0^{usk} \tilde{B}_1^{dsid'} \tilde{B}_2^{dsrnd}\}$  (nonce) is computed as below.

(1)  $U$  select  $(\alpha_u, \alpha_d, \alpha_r) \xleftarrow{R} \mathbb{Z}_p^3$  and computes  $\tilde{R}_d = e(Y_0^{\alpha_u}, \tilde{\sigma}'_1)$ ,  $\tilde{R}_p = \tilde{B}_0^{\alpha_u} \tilde{B}_2^{\alpha_d} \tilde{B}_2^{\alpha_r}$ ,  $c_3 = H(\omega \| psu \| \tilde{R}_d \| \tilde{R}_p \| \text{nonce})$  and  $s_u = \alpha_u - usk \cdot c_3$ ,  $s_d = \alpha_d - dsid' \cdot c_3$ ,  $s_r = \alpha_r - dsrnd \cdot c_3$ .  $U$  sends  $\Pi_3 = (c_3, s_u, s_d, s_r)$  to  $S$ .

(2)  $S$  verifies  $c_3 \stackrel{?}{=} H(\omega \| psu \| e(Y_0^{s_u}, \tilde{\sigma}'_1) \omega^{c_3}) \| \tilde{B}_0^{s_u} \tilde{B}_1^{s_d} \tilde{B}_2^{s_r} \cdot psu^{c_3} \| \text{nonce}$ .

#### S3.4 Details of $\Pi_4$ .

The proof  $\Pi_4 = \text{ZKSoK}\{(t', dsrnd) : T_1 = g^{t'} B_2^{dsrnd} \wedge T_3' = e(B_0^{dsrnd}, \tilde{T}_1')\}$  (nonce) is computed as below.

(1)  $U$  select  $(\alpha_t, \alpha_r) \xleftarrow{R} \mathbb{Z}_p^2$  and computes  $R_1 = g^{\alpha_t} B_2^{\alpha_r}$ ,  $\tilde{R}_2 = e(B_0^{\alpha_r}, \tilde{T}_1')$ ,  $c_4 = H(T_1 \| T_3' \| R_1 \| \tilde{R}_2 \| \text{nonce})$  and  $s_t = \alpha_t - t' \cdot c_4$ ,  $s_r = \alpha_r - dsrnd \cdot c_4$ .  $U$  sends  $(c_4, s_t, s_r)$  to  $V$ .

(2)  $V$  verifies  $c_3 \stackrel{?}{=} H(T_1 \| T_3' \| g^{s_t} B_2^{s_r} T_1^{c_4} \| e(B_0^{s_r}, \tilde{T}_1') \cdot (T_3')^{c_4} \| \text{nonce})$ .

### S4. Formal Correctness Definition

(1) The tickets produced by the Issue algorithm must be verifiable by the Show;

$$\Pr \left[ \begin{array}{l} \text{Show} \\ (U(usk, tkt, \\ VP_{tkt}, spk, pp) \\ \leftrightarrow V(spk, pp) \\ \rightarrow ((dsid, \\ dstrace), 1)) \end{array} \left| \begin{array}{l} \text{Setup}(1^\lambda) \rightarrow (msk, pp, \mathbb{P}); \\ \text{SKeyGen}(pp) \rightarrow (ssk, spk); \\ \text{SReg}(S(ssk, spk, pp) \\ \leftrightarrow CA(msk, spk, pp)) \rightarrow cred_s; \\ \text{UKeyGen}(pp) \rightarrow (usk, upk); \\ \text{UReg}(U(usk, upk, \mathbb{A}, \\ pp) \leftrightarrow CA(msk, upk, pp)) \rightarrow cred_u; \\ \text{Issue}(U(usk, cred_u, \\ \mathcal{D}, \mathbb{A}, pp) \leftrightarrow S(ssk, cred_s, \\ pp, \mathbb{P})) \rightarrow ((tkt, VP_{tkt}), 1) \end{array} \right. \right] = 1$$

(2) The DSTrace algorithm must be able to track users who attempt double-spending behavior

$$\Pr \left[ \begin{array}{l} \text{DSTrace}(dsid, \\ dstrace, \overline{dsid}, \\ \overline{dstrace}, spk, \\ pp) \rightarrow (dsblame, \\ upk'), \\ \text{VerifyDS}( \\ dsblame, upk') \\ \rightarrow 1 \end{array} \left| \begin{array}{l} \text{Setup}(1^\lambda) \rightarrow (msk, pp, \mathbb{P}); \\ \text{SKeyGen}(pp) \rightarrow (ssk, spk); \\ \text{SReg}(S(ssk, spk, pp) \\ \leftrightarrow CA(msk, spk, pp)) \rightarrow cred_s; \\ \text{UKeyGen}(pp) \rightarrow (usk, upk); \\ \text{UReg}(U(usk, upk, \mathbb{A}, \\ pp) \leftrightarrow CA(msk, upk, pp)) \rightarrow cred_u; \\ \text{Issue}(U(usk, cred_u, \\ \mathcal{D}, \mathbb{A}, pp) \leftrightarrow S(ssk, cred_s, \\ pp, \mathbb{P})) \rightarrow ((tkt, VP_{tkt}), 1) \\ \text{Show}(U(usk, tkt, \\ VP_{tkt}, spk, pp) \leftrightarrow V(spk, pp) \\ \rightarrow ((dsid, dstrace), 1)); \\ \text{Show}(U(usk, tkt, \\ VP_{tkt}, spk, pp) \leftrightarrow V(spk, pp) \\ \rightarrow ((dsid, \overline{dstrace}), 1)); \end{array} \right. \right] = 1$$
